# Supplementary material for: DNA Synthesis Is Required for Reprogramming Mediated by Stem Cell Fusion
Source: PubMed Central journal article supplement (PMC3605571; doi:10.1016/j.cell.2013.01.012), 2013-02-14
Supplement: mmc1.pdf [file mmc1.pdf]

**Table S1. Pluripotent Hybrid Colony Formation of Cell-Cycle-Enriched mESCs Fused with mB Cells, Related to Figure 2**

|        | Number of AP <sup>+</sup> Puro <sup>+</sup> colonies per 10 <sup>7</sup> fused cells |         |            |            | Total |
|--------|--------------------------------------------------------------------------------------|---------|------------|------------|-------|
|        | G1 (F8)                                                                              | S (F12) | S/G2 (F13) | G2/M (F16) |       |
| Exp. 1 | 178                                                                                  | 1000    | n/s        | 1609       | 880   |
| Exp. 2 | 102                                                                                  | n/s     | 743        | 526        | 257   |
| Exp. 3 | 75                                                                                   | 106     | 276        | 280        | 140   |

Hybrid reprogramming was assessed on the basis of both alkaline phosphatase expression and Puromycin resistance (AP<sup>+</sup>, Puro<sup>+</sup>), 12 days after fusion as described in Figure 2A. n/s indicates not scored.

**Table S2A. Percentage of Cells with Different Oct4 Signal Intensity Levels, Related to Figure 3**

|            | Low | Medium | High |
|------------|-----|--------|------|
| G1 (F8)    | 60  | 26     | 14   |
| G1 (F9)    | 66  | 24     | 10   |
| S (F12)    | 60  | 30     | 10   |
| S/G2 (F13) | 47  | 39     | 15   |
| G2/M (F16) | 34  | 48     | 18   |

**Table S2B. Percentage of Cells with Different Sox2 Signal Intensity Levels, Related to Figure 3**

|            | Low | Medium | High |
|------------|-----|--------|------|
| G1 (F8)    | 40  | 46     | 14   |
| G1 (F9)    | 35  | 58     | 31   |
| S (F12)    | 26  | 50     | 24   |
| S/G2 (F13) | 10  | 35     | 55   |
| G2/M (F16) | 11  | 32     | 56   |

**Table S2C. Percentage of Cells with Different Nanog Signal Intensity Levels, Related to Figure 3**

|            | Low | Medium | High |
|------------|-----|--------|------|
| G1 (F8)    | 31  | 49     | 19   |
| G1 (F9)    | 30  | 54     | 16   |
| G1/S (F10) | 26  | 55     | 19   |
| S (F11-12) | 26  | 60     | 14   |
| S/G2 (F13) | 24  | 61     | 15   |
| G2/M (F16) | 28  | 61     | 12   |
